# Supplementary material for: Targeted crystal growth of uranium gallophosphates via the systematic exploration of the UF4–GaPO4–ACl (A = Cs, Rb) phase space
Source: Royal Society of Chemistry journal article supplement (doi:10.1039/d0ce00343c), 2020-01-01
Supplement: d0ce00343c1.pdf [file d0ce00343c1.pdf]

## Targeted Crystal Growth of Uranium Gallophosphates via the Systematic Exploration of the $\text{UF}_4\text{-GaPO}_4\text{-ACl}$ ( $\text{A} = \text{Cs, Rb}$ ) Phase Space

Christian A. Juillerat,<sup>†§</sup> Vladislav V. Klepov,<sup>†</sup> Mark D. Smith,<sup>†</sup> Hans-Conrad zur Loye<sup>\*†§</sup>

<sup>†</sup>Department of Chemistry and Biochemistry, University of South Carolina, Columbia, SC, 29208, United States

<sup>§</sup>Center for Hierarchical Wasteform Materials (CHWM), University of South Carolina, Columbia, SC, 29208, United States

**Table S1:** Phase space summary of  $\text{UF}_4\text{-GaPO}_4\text{-RbCl}$  in 5mL fused silica crucibles.

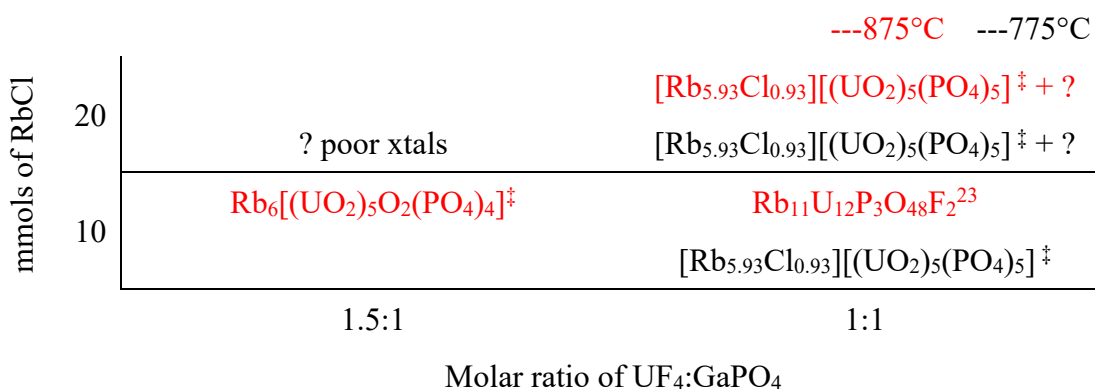

NOTE: The lack of more than one phase listed does not imply a phase pure product, but rather that only the major phase is reported. In many cases small impurities could not be identified

<sup>‡</sup>Structures from this work, <sup>37</sup>Reference 37

**Table S2:** Phase space summary of UF<sub>4</sub>-GaPO<sub>4</sub>-RbCl in 5mL Pt crucibles.

|               |    | ---875°C                                                                                                                                                                                                                                                                                          | ---775°C                                                                                                              |                                                                                                                                                                                                                          |
|---------------|----|---------------------------------------------------------------------------------------------------------------------------------------------------------------------------------------------------------------------------------------------------------------------------------------------------|-----------------------------------------------------------------------------------------------------------------------|--------------------------------------------------------------------------------------------------------------------------------------------------------------------------------------------------------------------------|
| mmols of RbCl | 20 | $\text{Rb}_{11}[(\text{UO}_2)_8(\text{PO}_4)_9]^{\ddagger}$<br>$\text{Rb}_6[(\text{UO}_2)_5\text{O}_5(\text{PO}_4)_2]^{25} +$<br>$\text{Rb}_4[(\text{UO}_2)_3\text{O}_2(\text{PO}_4)_2]^{25,27} +$<br>$\text{Rb}_9\text{U}_5\text{P}_6\text{O}_{34.5}^*$                                          | $\text{Rb}_9\text{U}_5\text{P}_6\text{O}_{34.5}^*$<br><br>$\text{Rb}_9\text{U}_5\text{P}_6\text{O}_{34.5}^*$          | $\text{Rb}_9\text{U}_5\text{P}_6\text{O}_{34.5}^* +$<br>$\text{GaPO}_4 + \text{Ga}_2\text{O}_3$<br><br>$\text{Rb}_9\text{U}_5\text{P}_6\text{O}_{34.5}^*$                                                                |
|               | 10 | $\text{Rb}_6[(\text{UO}_2)_5\text{O}_2(\text{PO}_4)_4]^{25} +$<br>$\text{Rb}_6[(\text{UO}_2)_5\text{O}_5(\text{PO}_4)_2]^{\ddagger} +$<br>$\text{Rb}_9\text{U}_5\text{P}_6\text{O}_{34.5}^*$<br>$\text{Rb}_4\text{U}_5\text{O}_{17}^{28} +$<br>$\text{Rb}_9\text{U}_5\text{P}_6\text{O}_{34.5}^*$ | $\text{Rb}_9\text{U}_5\text{P}_6\text{O}_{34.5}^*$<br><br>$\text{Rb}_{11}[(\text{UO}_2)_8(\text{PO}_4)_9]^{\ddagger}$ | $\text{Rb}_9\text{U}_5\text{P}_6\text{O}_{34.5}^*$<br>$\text{GaPO}_4 + \text{Ga}_2\text{O}_3$<br><br>$\text{Rb}_{11}[(\text{UO}_2)_8(\text{PO}_4)_9]^{\ddagger}$<br>$+ \text{Rb}_9\text{U}_5\text{P}_6\text{O}_{34.5}^*$ |
|               |    | 1.5:1                                                                                                                                                                                                                                                                                             | 1:1                                                                                                                   | 1:2                                                                                                                                                                                                                      |
|               |    | Molar ratio of UF <sub>4</sub> :GaPO <sub>4</sub>                                                                                                                                                                                                                                                 |                                                                                                                       |                                                                                                                                                                                                                          |

NOTE: The lack of more than one phase listed does not imply a phase pure product, but rather that only the major phase is reported. In many cases small impurities could not be identified

\*Crystal quality poor with extensive disorder,  $a = 13.7939(7)$  Å,  $c = 9.5213(6)$  Å,  $\alpha = \beta = \gamma = 90^\circ$ ,  $R_1 = 0.0886$

‡Structures from this work, all other superscript numbers correspond to references in main text

<sup>25,27</sup>Analogous to other layered phosphuranylite structures in ref. 21, 22, expected corrugation based on  $\text{Rb}_6[(\text{UO}_2)_5\text{O}_5(\text{PO}_4)_2]$ , poor crystal quality,  $a = 6.9127(6)$  Å,  $b = 7.0226(7)$  Å,  $c = 16.9750(15)$  Å,  $\alpha = 89.981(4)$ ,  $\beta = 89.989(4)$ ,  $\gamma = 89.595(4)$ ,  $R_1 = 0.01443$

**Table S3:** Phase space summary of UF<sub>4</sub>-GaPO<sub>4</sub>-CsCl in 5mL Pt crucibles.

|               |    | ---875°C                                                                                                                              | ---775°C                                                                                                                                                                                           |
|---------------|----|---------------------------------------------------------------------------------------------------------------------------------------|----------------------------------------------------------------------------------------------------------------------------------------------------------------------------------------------------|
| mmols of CsCl | 20 | $\text{Cs}_6[(\text{UO}_2)_7\text{O}_4(\text{PO}_4)_4]^{30}$ $[\text{Cs}_4\text{Cs}_4\text{Cl}][(\text{UO}_2)_4(\text{PO}_4)_5]^{14}$ | $\text{Cs}_4[(\text{UO}_2\text{Ga}_2(\text{PO}_4)_4)^{\ddagger}]$<br>$\text{Cs}_4[(\text{UO}_2\text{Ga}_2(\text{PO}_4)_4)^{\ddagger}]$                                                             |
|               | 10 | $\text{Cs}_6[(\text{UO}_2)_7\text{O}_4(\text{PO}_4)_4]^{30}$ $\text{Cs}_2(\text{UO}_2)_2(\text{PO}_4)_2^{29}$                         | $\text{Cs}_4[(\text{UO}_2\text{Ga}_2(\text{PO}_4)_4)^{\ddagger} +$<br>$[\text{Cs}_4\text{Cs}_4\text{Cl}][(\text{UO}_2)_4(\text{PO}_4)_5]^{14}$<br>$\text{Cs}_2(\text{UO}_2)_2(\text{PO}_4)_2^{29}$ |
|               |    | 1.5:1                                                                                                                                 | 1:1                                                                                                                                                                                                |
|               |    | Molar ratio of UF <sub>4</sub> :GaPO <sub>4</sub>                                                                                     |                                                                                                                                                                                                    |

NOTE: The lack of more than one phase listed does not imply a phase pure product, but rather that only the major phase is reported. In many cases small impurities could not be identified

‡Structures from this work, all other superscript numbers correspond to references in main text

?? Single crystals were not of sufficient quality to determine a reliable unit cell or unit cell contents

**Table S4:** BVS and bond distances for Cs<sub>2</sub>UO<sub>2</sub>Ga<sub>2</sub>O<sub>5</sub> (**2**).

| Interaction   | Distance     | Interaction    | Distance     |
|---------------|--------------|----------------|--------------|
| U1 – O1 x 2   | 1.849(4)     | Ga2 – O2       | 1.849(4)     |
| U1 – O2 x 4   | 2.401(4)     | Ga2 – O3 x2    | 1.806(2)     |
| U1 – O4       | 2.425(6)     | Ga2 – O4       | 1.8229(13)   |
| <b>BVS U1</b> | <b>5.926</b> | <b>BVS Ga2</b> | <b>3.132</b> |

**Table S5:** BVS and bond distances for [Rb<sub>5.93</sub>Cl<sub>0.93</sub>][(UO<sub>2</sub>)<sub>5</sub>(PO<sub>4</sub>)<sub>5</sub>](**3**).

| Interaction    | Distance     | Interaction    | Distance    | Interaction    | Distance    |
|----------------|--------------|----------------|-------------|----------------|-------------|
| U1 – O9        | 2.428(9)     | U2 – O12       | 2.241(12)   | U3 – O1        | 2.443(15)   |
| U1 – O10       | 2.492(9)     | U2 – O15       | 2.257(12)   | U3 – O4        | 2.672(13)   |
| U1 – O10       | 2.384(9)     | U2 – O18       | 2.263(11)   | U3 – O5        | 2.294(11)   |
| U1 – O14       | 2.248(10)    | U2 – O19       | 2.210(11)   | U3 – O20       | 2.270(10)   |
| U1 – O16       | 2.244(10)    | U2 – O23       | 1.803(11)   | U3 – O25       | 1.781(11)   |
| U1 – O21       | 1.774(10)    | U2 – O24       | 1.778(12)   | U3 – O30       | 1.782(11)   |
| U1 – O22       | 1.786(10)    | <b>BVS U2</b>  | <b>6.07</b> | <b>BVS U3</b>  | <b>6.07</b> |
| <b>BVS U1</b>  | <b>6.18</b>  | U5B – O2       | 2.255(16)   | U5C – O2       | 2.671(18)   |
| U5A – O2       | 2.440(14)    | U5B – O2       | 3.03(3)     | U5C – O2       | 3.17(3)     |
| U5A – O2       | 2.641(18)    | U5B – O4       | 3.00(4)     | U5C – O4       | 2.800(19)   |
| U5A – O4       | 2.425(14)    | U5B – O6       | 2.489(13)   | U5C – O6       | 2.096(17)   |
| U5A – O6       | 2.296(12)    | U5B – O8       | 1.784(14)   | U5C – O8       | 1.835(17)   |
| U5A – O8       | 2.308(13)    | U5B – O28B     | 1.75(4)     | U5C – O28B     | 1.96(4)     |
| U5A – O28A     | 1.803(14)    | U5B – O29      | 1.808(12)   | U5B – O29      | 1.654(14)   |
| U5A – O29      | 1.738(10)    | <b>BVS U5B</b> | <b>6.49</b> | <b>BVS U5C</b> | <b>6.43</b> |
| <b>BVS U5A</b> | <b>5.95</b>  | P1 – O1        | 1.530(16)   | P2 – O5        | 1.511(11)   |
| U4 – O3        | 2.297(11)    | P1 – O2        | 1.436(13)   | P2 – O6        | 1.521(13)   |
| U4 – O7        | 2.245(12)    | P1 – O3        | 1.486(11)   | P2 – O7        | 1.486(14)   |
| U4 – O11       | 2.257(10)    | P1 – O4        | 1.600(14)   | P2 – O8        | 1.529(14)   |
| U4 – O13       | 2.291(10)    | <b>BVS P1</b>  | <b>5.37</b> | <b>BVS P2</b>  | <b>5.26</b> |
| U4 – O26       | 1.809(11)    | P4 – O10       | 1.547(11)   | P5 – O17       | 1.527(11)   |
| U4 – O27       | 1.690(12)    | P4 – O14       | 1.508(10)   | P5 – O18       | 1.505(11)   |
| <b>BVS U4</b>  | <b>6.071</b> | P4 – O15       | 1.515(12)   | P5 – O19       | 1.522(11)   |
| P3 – O9        | 1.532(8)     | P4 – O16       | 1.515(10)   | P5 – O20       | 1.527(10)   |
| P3 – O10       | 1.547(10)    | <b>BVS P4</b>  | <b>5.19</b> | <b>BVS P5</b>  | <b>5.20</b> |
| P3 – O11       | 1.504(11)    |                |             |                |             |
| P3 – O12       | 1.514(12)    |                |             |                |             |
| <b>BVS P3</b>  | <b>5.15</b>  |                |             |                |             |

**Table S6:** BVS and bond distances for  $\text{Rb}_{11}[(\text{UO}_2)_8(\text{PO}_4)_9]$  (4).

| Interaction   | Distance    | Interaction      | Distance    | Interaction      | Distance    |
|---------------|-------------|------------------|-------------|------------------|-------------|
| U1 – O1       | 1.810(10)   | U2 – O6A         | 2.23(3)     | U3 – O10B        | 2.483(12)   |
| U1 – O2       | 1.787(10)   | U2 – O6B         | 2.39(3)     | U3 – O12A        | 2.34(3)     |
| U1 – O3 x 2   | 2.270(8)    | U2 – O7          | 1.766(10)   | U3 – O12B        | 2.41(3)     |
| U1 – O10A     | 2.413(13)   | U2 – O8          | 1.822(14)   | U3 – O13         | 1.778(10)   |
| U1 – O11A     | 2.43(2)     | U2 – O9A         | 2.22(2)     | U3 – O14         | 1.780(10)   |
| U1 – O11B     | 2.323(19)   | U2 – O9B         | 2.532(18)   | U3 – O15A        | 2.26(3)     |
| <b>BVS U1</b> | <b>6.14</b> | U2 – O10B        | 2.490(11)   | U3 – O15B        | 2.28(3)     |
| U4 – O4A      | 2.506(19)   | <b>BVS U2</b>    | <b>6.06</b> | <b>BVS U4</b>    | <b>6.20</b> |
| U4 – O4A      | 2.359(17)   | P1(A) – O15A x 4 | 1.52(3)     | P1(B) – O15B x 4 | 1.56(3)     |
| U4 – O4B      | 2.25(2)     | <b>BVS P1(A)</b> | <b>5.20</b> | <b>BVS P1(B)</b> | <b>4.67</b> |
| U4 – O5A      | 2.385(14)   | P2A – O9A        | 1.49(2)     | P2B – O9B        | 1.515(17)   |
| U4 – O5B      | 2.246(14)   | P2A – O10A       | 1.556(15)   | P2B – O10B       | 1.579(13)   |
| U4 – O16      | 1.804(12)   | P2A – O11A       | 1.49(2)     | P2B – O11B       | 1.47(2)     |
| U4 – O17      | 1.807(15)   | P2A – O12A       | 1.55(3)     | P2B – O12B       | 1.50(3)     |
| <b>BVS U4</b> | <b>6.07</b> | <b>BVS P2A</b>   | <b>5.20</b> | <b>BVS P2B</b>   | <b>5.29</b> |
|               |             | P3A – O3         | 1.487(16)   | P3B – O3         | 1.533(16)   |
|               |             | P3A – O4A        | 1.565(18)   | P3B – O4B        | 1.505(19)   |
|               |             | P3A – O5A        | 1.536(18)   | P3B – O5B        | 1.511(19)   |
|               |             | P3A – O6A        | 1.48(3)     | P3B – O6B        | 1.55(3)     |
|               |             | <b>BVS P3A</b>   | <b>5.36</b> | <b>BVS P3B</b>   | <b>5.14</b> |

**Table S7:** BVS and bond distances for  $\text{Rb}_{7.6}[(\text{UO}_2)_8\text{O}_{8.6}\text{F}_{0.4}(\text{PO}_4)_2]$  (5).

| Interaction   | Distance        | Interaction    | Distance  | Interaction    | Distance         |
|---------------|-----------------|----------------|-----------|----------------|------------------|
| U1 – O1       | 1.811(11)       | U4A – O4/F4    | 2.177(10) | U4B – O4/F4    | <b>2.464(10)</b> |
| U1 – O2       | 1.817(11)       | U4A – O8       | 2.343(13) | U4B – O8       | 2.133(15)        |
| U1 – O3       | 2.328(10)       | U4A – O11      | 2.890(19) | U4B – O11      | 2.484(19)        |
| U1 – O3       | 2.293(10)       | U4A – O14      | 2.297(11) | U4B – O14      | 2.547(11)        |
| U1 – O4/F4    | 2.354(10)       | U4A – O15      | 1.796(13) | U4B – O15      | 1.820(13)        |
| U1 – O12      | 2.342(10)       | U4A – O16      | 1.837(13) | U4B – O16      | <b>1.818(13)</b> |
| U1 – O17      | 2.343(12)       | U4A – O17      | 2.246(12) | U4B – O17      | 2.061(12)        |
| <b>BVS U1</b> | <b>6.07</b>     | <b>BVS U4A</b> | 6.01      | <b>BVS U4B</b> | <b>6.20</b>      |
| U2 – O7       | 2.612(14)       | U3 – O3        | 2.294(10) | P1 – O7        | 1.572(14)        |
| U2 – O8       | 2.228(11)       | U3 – O4/F4     | 2.221(9)  | P1 – O12       | <b>1.543(11)</b> |
| U2 – O9       | 1.824(12)       | U3 – O5        | 1.800(11) | P1 – O13       | 1.497(17)        |
| U2 – O10      | 1.833(11)       | U3 – O6        | 1.799(11) | P1 – O14       | 1.567(10)        |
| U2 – O11      | 2.31(2)/2.13(2) | U3 – O7        | 2.481(13) | <b>BVS P1</b>  | 4.87             |
| U2 – O12      | 2.435(11)       | U3 – O8        | 2.381(13) |                |                  |
| U2 – O17      | 2.207(11)       | U3 – O14       | 2.547(11) |                |                  |
| <b>BVS U2</b> | <b>6.07</b>     | <b>BVS U3</b>  | 5.94      |                |                  |

**Table S8:** BVS and bond distances for  $\text{Rb}_6[(\text{UO}_2)_5\text{O}_2(\text{PO}_4)_4]$  (**5**).

| Interaction   | Distance     | Interaction   | Distance     | Interaction   | Distance     |
|---------------|--------------|---------------|--------------|---------------|--------------|
| U1 – O1       | 2.308(3)     | U2 – O2       | 2.326(3)     | U3 – O7 x 2   | 2.414(3)     |
| U1 – O3       | 2.398(3)     | U2 – O2       | 2.517(3)     | U3 – O11 x 2  | 1.813(4)     |
| U1 – O5       | 2.292(3)     | U2 – O3       | 2.423(3)     | U3 – O12 x 2  | 2.199(3)     |
| U1 – O6       | 2.451(3)     | U2 – O6       | 2.277(3)     | <b>BVS U3</b> | <b>5.661</b> |
| U1 – O12      | 2.318(3)     | U2 – O9       | 1.802(3)     | P1 – O1       | 1.526(3)     |
| U1 – O13      | 1.795(3)     | U2 – O10      | 1.804(4)     | P1 – O2       | 1.576(3)     |
| U1 – O14      | 1.812(3)     | U2 – O12      | 2.248(3)     | P1 – O3       | 1.565(3)     |
| <b>BVS U1</b> | <b>6.033</b> | <b>BVS U2</b> | <b>6.041</b> | P1 – O4       | 1.488(4)     |
|               |              |               |              | <b>BVS P1</b> | <b>4.964</b> |
